# Supplementary material for: Breadth and magnitude of antigen-specific antibody responses in the control of plasma viremia in simian immunodeficiency virus infected macaques
Source: Springer Nature journal article supplement (doi:10.1186/s12985-016-0652-x), 2016-12-01
Supplement: MOESM1 [file 11106000]

**Additional file 1: Table S1.** Quantification of total IgG, IgM and IgA following SIV<sub>MAC251</sub> infection in rhesus macaques

Intravaginally infected animals

Total IgG ( $\mu\text{g/ml}$  of plasma)

| Days post infection | BC35  | CL87  | GN91 | CL86 | DE50  | FK88 | Mean Value |
|---------------------|-------|-------|------|------|-------|------|------------|
| 0                   | 1954  | 6894  | 8735 | 3102 | 2209  | 3461 | 4393       |
| 13                  | 1573  | 5581  | 3394 | 2517 | 2121  | 2751 | 2990       |
| 20                  | 5664  | 4363  | 9234 | 2203 | 1780  | 5728 | 4829       |
| 27                  | 7444  | 6600  | 8578 | 4625 | 4369  | 6531 | 6358       |
| 41                  | 4144  | 7360  | 2240 | 3396 | 6448  | 5560 | 4858       |
| 55                  | 4303  | 3810  | 4015 | 2904 | 9199  | 6439 | 5112       |
| 73                  | 5344  | 4026  | 5973 | -    | -     | -    | 5115       |
| 84                  | 7589  | 5131  | 2988 | 2547 | 7810  | 2153 | 4703       |
| 126                 | 8576  | 9932  | 6357 | 5389 | 13978 | 3093 | 7887       |
| 150                 | 4888  | 4049  | 6752 | -    | -     | -    | 5230       |
| 204                 | 11359 | 9019  | 6639 | -    | -     | -    | 9006       |
| 257                 | 10340 | 10828 | 6932 | -    | -     | -    | 9367       |

Total IgM ( $\mu\text{g/ml}$  of plasma)

| Days post infection | BC35 | CL87 | GN91 | CL86 | DE50 | FK88 | Mean Value |
|---------------------|------|------|------|------|------|------|------------|
| 0                   | 1726 | 1850 | 1292 | 1123 | 2739 | 679  | 1568       |
| 13                  | 2213 | 1482 | 174  | 1554 | 1112 | 1128 | 1277       |
| 20                  | 903  | 2540 | 144  | 4147 | 914  | 1327 | 1662       |
| 27                  | 1211 | 734  | 398  | 1122 | 1623 | 1272 | 1060       |
| 41                  | 939  | 1715 | 157  | 794  | 3681 | 1034 | 1387       |
| 55                  | 1190 | 2947 | 203  | 1455 | 3117 | 407  | 1553       |
| 73                  | 1629 | 1649 | 1604 | -    | -    | -    | 1627       |
| 84                  | 1987 | 1554 | 893  | 1966 | 3911 | 155  | 1744       |
| 126                 | 1866 | 2054 | 731  | 3181 | 2595 | 234  | 1777       |
| 150                 | 1513 | 389  | 416  | -    | -    | -    | 772        |
| 204                 | 719  | 860  | 71   | -    | -    | -    | 550        |
| 257                 | 1063 | 1010 | 2697 | -    | -    | -    | 1590       |

Total IgA ( $\mu\text{g/ml}$  of plasma)

| Days post infection | BC35 | CL87 | GN91 | CL86 | DE50 | FK88 | Mean Value |
|---------------------|------|------|------|------|------|------|------------|
| 0                   | 1200 | 1181 | 720  | 365  | 2546 | 314  | 1054       |
| 13                  | 1117 | 1426 | 725  | 502  | 1288 | 198  | 876        |
| 20                  | 843  | 1363 | 832  | 620  | 1265 | 1135 | 1010       |
| 27                  | 749  | 375  | 416  | 235  | 2769 | 1135 | 946        |
| 41                  | 948  | 640  | 447  | 335  | 690  | 1110 | 695        |
| 55                  | 1157 | 841  | 892  | 414  | 1189 | 1431 | 987        |
| 73                  | 1069 | 1683 | 1414 | -    | -    | -    | 1388       |
| 84                  | 1573 | 1931 | 887  | 1434 | 1063 | 908  | 1299       |
| 126                 | 1145 | 2258 | 497  | 2019 | 441  | 921  | 1213       |
| 150                 | 1589 | 896  | 288  | -    | -    | -    | 924        |
| 204                 | 1371 | 738  | 204  | -    | -    | -    | 771        |
| 257                 | 757  | 804  | 336  | -    | -    | -    | 632        |

Intrarectally infected animals

Total IgG ( $\mu\text{g/ml}$  of plasma)

| <b>Days post infection</b> | <b>AE14</b> | <b>AP09</b> | <b>AP64</b> | <b>BG21</b> | <b>N107</b> | <b>P205</b> | <b>T153</b> | <b>Mean Value</b> |
|----------------------------|-------------|-------------|-------------|-------------|-------------|-------------|-------------|-------------------|
| 0                          | 1918        | 929         | 1411        | 1249        | 1149        | 1908        | 2164        | 1533              |
| 25                         | 1786        | 1906        | 1546        | 2089        | 1158        | 2025        | 2717        | 1889              |
| 42                         | 2317        | 2099        | 1773        | 2759        | 1173        | 1979        | 2677        | 2111              |
| 68                         | 2883        | 1039        | 2244        | 1982        | 1390        | 1547        | 3237        | 2046              |
| 95                         | 1809        | 1078        | 1793        | 2087        | 1065        | 1587        | 3538        | 1851              |
| 236                        | 1147        | 1331        | 2899        | 4582        | 902         | 898         | 3356        | 2159              |
| 272                        | 5139        | 3518        | 3377        | 5711        | 960         | -           | 5463        | 4028              |

Total IgM ( $\mu\text{g/ml}$  of plasma)

| <b>Days post infection</b> | <b>AE14</b> | <b>AP09</b> | <b>AP64</b> | <b>BG21</b> | <b>N107</b> | <b>P205</b> | <b>T153</b> | <b>Mean Value</b> |
|----------------------------|-------------|-------------|-------------|-------------|-------------|-------------|-------------|-------------------|
| 0                          | 1184        | 1081        | 248         | 1607        | 3227        | 2173        | 2123        | 1663              |
| 25                         | 997         | 2092        | 836         | 1725        | 2576        | 2037        | 3112        | 1911              |
| 42                         | 3129        | 2769        | 1669        | 1050        | 3140        | 7209        | 4787        | 3393              |
| 68                         | 3727        | 2008        | 812         | 2377        | 3733        | 2362        | 2112        | 2447              |
| 95                         | 2368        | 1756        | 850         | 1275        | 3360        | 2746        | 4286        | 2377              |
| 236                        | 1494        | 3402        | 509         | 1397        | 2487        | 2029        | 1046        | 1766              |
| 272                        | 1796        | 2319        | 509         | 1222        | 2081        | -           | 1090        | 1503              |

Total IgA ( $\mu\text{g/ml}$  of plasma)

| <b>Days post infection</b> | <b>AE14</b> | <b>AP09</b> | <b>AP64</b> | <b>BG21</b> | <b>N107</b> | <b>P205</b> | <b>T153</b> | <b>Mean Value</b> |
|----------------------------|-------------|-------------|-------------|-------------|-------------|-------------|-------------|-------------------|
| 0                          | 1919        | 309         | 203         | 2031        | 161         | 906         | 592         | 874               |
| 25                         | 1496        | 393         | 205         | 2031        | 117         | 727         | 615         | 798               |
| 68                         | 2764        | 345         | 154         | 2089        | 121         | 1433        | 744         | 1093              |
| 236                        | 1277        | 364         | 159         | 1926        | 99          | 814         | 1187        | 832               |

Note: "-" denotes no data recorded for that time point
